# Supplementary material for: Possible Case of Novel Spotted Fever Group Rickettsiosis in Traveler Returning to Japan from India
Source: PubMed Central journal article supplement (PMC4880103; doi:10.3201/eid2206.151985), 2016-06
Supplement: 15-1985-Techapp-s1.pdf [file 15-1985-Techapp-s1.pdf]

# Possible Case of Novel Spotted Fever Group Rickettsiosis in Traveler Returning to Japan from India

## Technical Appendix 1

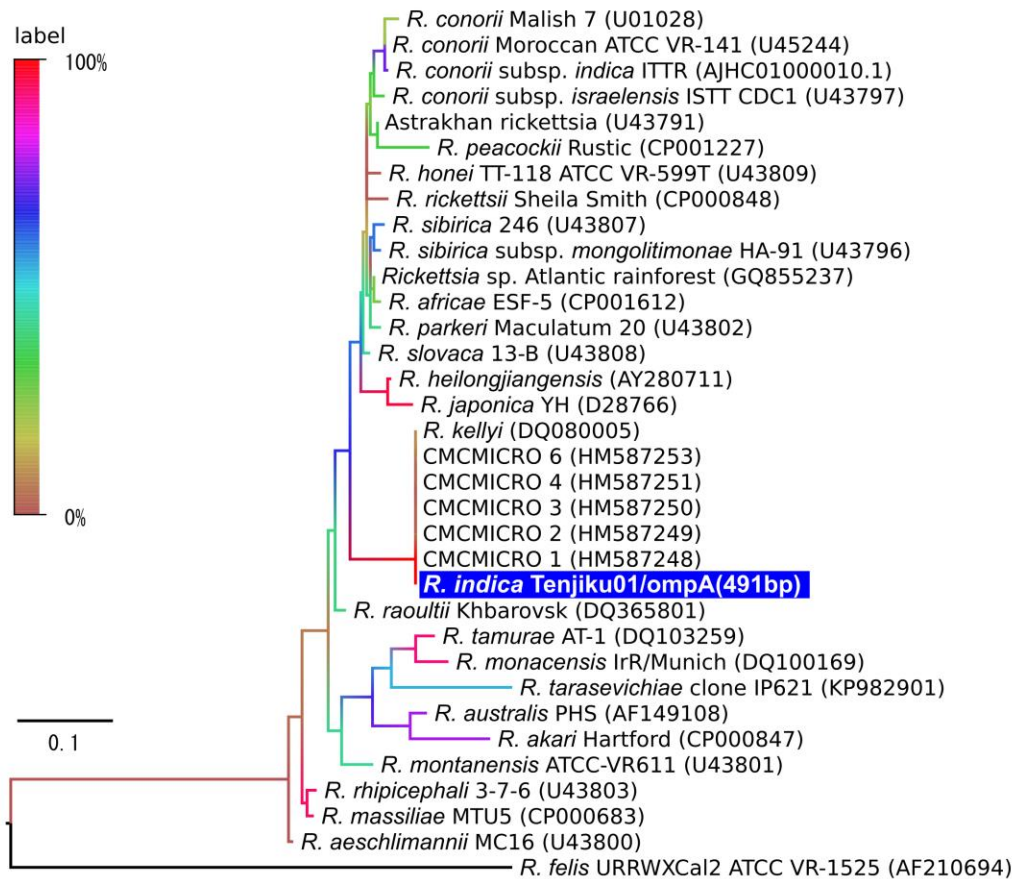

**Technical Appendix 1 Figure.** Maximum-likelihood phylogenetic tree of outer membrane protein A sequences in 34 *Rickettsia* spp. strains constructed by using MEGA software version 4.0 (<http://www.megasoftware.net>) with 1,000-fold bootstrapping. The color of each branch represents the bootstrapping value. GenBank assembly accession numbers are given in parentheses. Scale bar indicates the number of nucleotide substitutions per site.
